# Supplementary material
Source: PubMed Central journal article supplement (PMC6434585)
Supplement: Supp_Table1.pdf [file Supp_Table1.pdf]

## Supplementary Data

SUPPLEMENTARY TABLE S1. BASELINE CHARACTERISTICS OF PARTICIPANTS

|                                            | n (%)     |
|--------------------------------------------|-----------|
| Age (years)                                |           |
| 16–19                                      | 18 (15.9) |
| 20–29                                      | 73 (64.6) |
| 30+                                        | 22 (19.5) |
| Marital status                             |           |
| Never                                      | 89 (84.0) |
| Ever                                       | 17 (16.0) |
| Religion                                   |           |
| Christian/Protestant                       | 86 (76.1) |
| Muslim                                     | 25 (22.1) |
| Other                                      | 2 (1.8)   |
| Sexual orientation                         |           |
| Homosexual                                 | 34 (30.4) |
| Bisexual                                   | 78 (69.6) |
| Years since first anal sex                 |           |
| 0–9                                        | 60 (57.1) |
| 10–26                                      | 45 (42.9) |
| No. of receptive partnerships <sup>a</sup> |           |
| None                                       | 26 (23.6) |
| 1–3                                        | 39 (35.5) |
| 4+                                         | 45 (40.9) |
| Condomless receptive sex                   |           |
| No                                         | 40 (46.0) |
| Yes                                        | 47 (54.0) |
| Any vaginal sex partners                   |           |
| No                                         | 39 (37.1) |
| Yes                                        | 66 (62.9) |
| HIV and ART status                         |           |
| HIV negative                               | 53 (46.9) |
| Untreated HIV positive                     | 35 (31.0) |
| Treated HIV positive                       | 25 (22.1) |
| Any HR-HPV                                 |           |
| No                                         | 40 (37.7) |
| Yes                                        | 66 (62.3) |

<sup>a</sup>In past year.

ART, antiretroviral therapy; HR-HPV, high-risk human papillomavirus.
