# Supplementary material
Source: PubMed Central journal article supplement (PMC6434585)
Supplement: Supp_Table2.pdf [file Supp_Table2.pdf]

SUPPLEMENTARY TABLE S2. BASELINE DEMOGRAPHIC, BEHAVIORAL, AND CLINICAL CHARACTERISTICS BY CLUSTER MEMBERSHIP

|                                                                | <i>Cluster 1 N=58</i><br>n (%) | <i>Cluster 2 N=6</i><br>n (%) | <i>Cluster 3 N=38</i><br>n (%) | <i>Cluster 4 N=11</i><br>n (%) | p*  |
|----------------------------------------------------------------|--------------------------------|-------------------------------|--------------------------------|--------------------------------|-----|
| Marital status                                                 |                                |                               |                                |                                | .29 |
| Never                                                          | 44 (81.5)                      | 4 (66.7)                      | 31 (86.1)                      | 10 (100.0)                     |     |
| Ever                                                           | 10 (18.5)                      | 2 (33.3)                      | 5 (13.9)                       | 0 (0.0)                        |     |
| Sexual orientation                                             |                                |                               |                                |                                | .29 |
| Homosexual                                                     | 21 (36.2)                      | 2 (33.3)                      | 7 (18.9)                       | 4 (36.4)                       |     |
| Bisexual                                                       | 37 (63.8)                      | 4 (66.7)                      | 30 (81.1)                      | 7 (63.6)                       |     |
| Years since first anal sex                                     |                                |                               |                                |                                | .39 |
| 0–9                                                            | 28 (51.9)                      | 3 (50.0)                      | 24 (68.6)                      | 5 (50.0)                       |     |
| 10–26                                                          | 26 (48.2)                      | 3 (50.0)                      | 11 (31.4)                      | 5 (50.0)                       |     |
| Concurrency                                                    |                                |                               |                                |                                | .64 |
| None                                                           | 10 (18.5)                      | 1 (16.7)                      | 10 (27.8)                      | 3 (30.0)                       |     |
| Men only                                                       | 23 (42.6)                      | 4 (66.7)                      | 12 (33.3)                      | 5 (50.0)                       |     |
| Both genders                                                   | 21 (38.9)                      | 1 (16.7)                      | 14 (38.9)                      | 2 (20.0)                       |     |
| Self-report years since HIV diagnosis                          | <i>n</i> = 19                  | <i>n</i> = 5                  | <i>n</i> = 6                   | <i>n</i> = 5                   |     |
| Median (interquartile range)                                   | 2 (0–5)                        | 2 (1–3)                       | 1 (1–1)                        | 2 (1–3)                        | .45 |
| CD4 <sup>+</sup> T cells (count/mm <sup>3</sup> ) <sup>1</sup> |                                |                               |                                |                                | .22 |
| ≥350                                                           | 8 (25.0)                       | 2 (40.0)                      | 9 (52.9)                       | 3 (50.0)                       |     |
| <350                                                           | 24 (75.0)                      | 3 (60.0)                      | 8 (47.1)                       | 3 (50.0)                       |     |
| Any HPV                                                        |                                |                               |                                |                                | .34 |
| No                                                             | 7 (13.0)                       | 1 (16.7)                      | 9 (25.0)                       | 3 (30.0)                       |     |
| Yes                                                            | 47 (87.0)                      | 5 (83.3)                      | 27 (75.0)                      | 7 (70.0)                       |     |
| Multiple HPV                                                   |                                |                               |                                |                                | .68 |
| 0                                                              | 7 (13.0)                       | 1 (16.7)                      | 9 (25.0)                       | 3 (30.0)                       |     |
| 1                                                              | 7 (13.0)                       | 0 (0.0)                       | 5 (13.9)                       | 1 (10.0)                       |     |
| 2–15                                                           | 40 (74.1)                      | 5 (83.3)                      | 22 (61.1)                      | 6 (60.0)                       |     |
| Wart-related low-risk HPVs                                     |                                |                               |                                |                                |     |
| 6                                                              | 17 (31.5)                      | 1 (16.7)                      | 12 (33.3)                      | 2 (20.0)                       | .82 |
| 11                                                             | 16 (29.6)                      | 0 (0.0)                       | 8 (22.2)                       | 1 (10.0)                       | .34 |

<sup>a</sup>Among HIV-infected only.

\*Fisher's exact test for categorical and Kruskal–Wallis rank test for continuous variables.

HPV, human papillomavirus.
